|                |             | p-values |        |        |        |        |        |        | Cover (%) |      |
|----------------|-------------|----------|--------|--------|--------|--------|--------|--------|-----------|------|
| Label          | ABU.        | ALL.     | Host   | V1     | V2     | V3     | V4     | V5     | Arch.     |      |
| Moorea         | Coral       | 0.7987   | 0.5065 | 0.0626 | 0.6817 | 0.0958 | 0.4526 | 0.4467 | 0.1456    | 22.4 |
|                | Macro       | 0.6965   | 0.0156 | <0.001 | 0.0050 | <0.001 | 0.0089 | <0.001 | 0.7334    | 6.3  |
|                | CCA         | 0.0598   | <0.001 | 0.2945 | <0.001 | <0.001 | <0.001 | <0.001 | <0.001    | 43.0 |
|                | Turf        | 0.5231   | <0.001 | <0.001 | <0.001 | 0.0044 | <0.001 | <0.001 | <0.001    | 11.3 |
|                | Porites     | 0.4010   | 0.0123 | 0.0091 | 0.0870 | 0.2584 | <0.001 | 0.0565 | 0.1349    | 11.9 |
|                | Pocillopora | 0.8580   | 0.2375 | 0.5865 | 0.0382 | 0.0243 | <0.001 | 0.0217 | 0.3786    | 4.4  |
|                | Montipora   | 0.8445   | 0.0468 | 0.0607 | 0.0562 | 0.8676 | <0.001 | 0.0847 | 0.2922    | 2.4  |
|                | Pavona      | 0.3575   | 0.5969 | 0.1874 | 0.0323 | 0.3141 | 0.0026 | 0.3111 | 0.1240    | 1.3  |
|                | Acropora    | 0.4003   | 0.2498 | 0.2488 | 0.2171 | 0.5084 | 0.2676 | 0.0396 | 0.0624    | 1.0  |
| Line - Islands | Coral       | 0.8440   | 0.0721 | 0.9942 | 0.0051 | 0.0859 | 0.0017 | 0.0152 | 0.2423    | 24.9 |
|                | Macro       | 0.3582   | <0.001 | 0.0156 | 0.0023 | <0.001 | <0.001 | <0.001 | 0.0022    | 16.4 |
|                | CCA         | 0.6061   | <0.001 | <0.001 | <0.001 | <0.001 | 0.8527 | 0.0442 | 0.0015    | 16.3 |
|                | Turf        | 0.6857   | 0.5433 | <0.001 | <0.001 | <0.001 | 0.3095 | <0.001 | <0.001    | 31.1 |
|                | Acropora    | 0.5311   | 0.6202 | 0.2237 | 0.1801 | 0.0653 | 0.7445 | 0.7619 | 0.3674    | 6.2  |
|                | Pocillopora | 0.2625   | 0.6781 | 0.4203 | 0.1687 | 0.5156 | <0.001 | 0.2367 | 0.0152    | 5.1  |
|                | Porites     | 0.0495   | 0.5628 | 0.9380 | 0.6827 | 0.4391 | 0.0085 | 0.1424 | <0.001    | 4.0  |
|                | Montipora   | 0.3896   | 0.8291 | 0.0615 | 0.3207 | 0.0486 | 0.4412 | 0.8579 | 0.0858    | 3.6  |
|                | Favia       | 0.7887   | 0.0016 | 0.0051 | 0.1556 | 0.0392 | <0.001 | 0.1730 | 0.5911    | 1.8  |
|                | Pavona      | 0.6622   | 0.4894 | 0.8478 | <0.001 | <0.001 | 0.4094 | 0.6520 | <0.001    | 1.1  |
|                | Platygyra   | 0.2589   | <0.001 | <0.001 | <0.001 | 0.4973 | 0.6223 | <0.001 | <0.001    | 0.6  |
|                | Millepora   | 1.0000   | <0.001 | <0.001 | 0.5000 | <0.001 | <0.001 | 0.5794 | 0.0007    | 0.6  |
| Nanwan Bay     | Coral       | 0.1912   | 0.0159 | <0.001 | <0.001 | <0.001 | 0.0069 | 0.0711 | <0.001    | 28.4 |
|                | Macro       | 0.2048   | 0.0005 | 0.0511 | <0.001 | 0.4476 | 0.3926 | <0.001 | 0.6726    | 6.5  |
|                | CCA         | <0.001   | <0.001 | <0.001 | <0.001 | <0.001 | <0.001 | <0.001 | <0.001    | 3.9  |
|                | Turf        | 0.4320   | <0.001 | 0.0553 | <0.001 | 0.2856 | <0.001 | <0.001 | 0.0066    | 34.7 |
|                | Montipora   | 0.0668   | 0.2057 | 0.0185 | 0.3788 | <0.001 | 0.2104 | 0.2597 | 0.9316    | 16.3 |
|                | Pocillopora | <0.001   | <0.001 | <0.001 | <0.001 | <0.001 | 0.8749 | 0.0378 | <0.001    | 2.8  |
|                | Favites     | 0.0289   | 0.3639 | 0.2342 | <0.001 | 0.0559 | 0.0461 | <0.001 | 0.0121    | 2.8  |
|                | Favia       | 0.8687   | <0.001 | 0.1783 | 0.0094 | 0.1186 | 0.0847 | 0.0624 | 0.0468    | 1.9  |
|                | Platygyra   | 0.2776   | 0.2962 | 0.0021 | <0.001 | 0.6503 | <0.001 | 0.0762 | 0.5183    | 1.7  |
|                | Acropora    | 0.0370   | 0.0151 | 0.0329 | 0.0006 | <0.001 | 0.0040 | 0.0773 | <0.001    | 0.8  |
|                | Porites     | 1.0000   | 0.5149 | 0.9696 | 0.0728 | 0.0021 | 0.4472 | <0.001 | <0.001    | 0.8  |
|                | Millepora   | 0.9065   | 0.0773 | 0.4270 | 0.9447 | 0.2494 | 0.8868 | 0.0981 | 0.7022    | 7.2  |
| Heron Reef     | Coral       | 0.0039   | 0.0298 | 0.0337 | <0.001 | <0.001 | 0.0020 | <0.001 | <0.001    | 30.8 |
|                | Macro       | 0.0668   | 0.3233 | 0.3347 | <0.001 | 0.1427 | 0.4842 | 0.1363 | 0.0005    | 5.8  |
|                | CCA         | 0.9947   | 0.0030 | 0.1713 | 0.0109 | <0.001 | 0.8651 | 0.0007 | 0.0192    | 1.8  |
|                | Turf        | <0.001   | <0.001 | 0.1389 | <0.001 | 0.0016 | 0.0042 | 0.0054 | <0.001    | 37.1 |
